# Supplementary material
Source: publisher site journal article supplement (https://www.dovepress.com/article/422372)
Supplement: Supplementary file 1 [file get_supplementary_file.php]

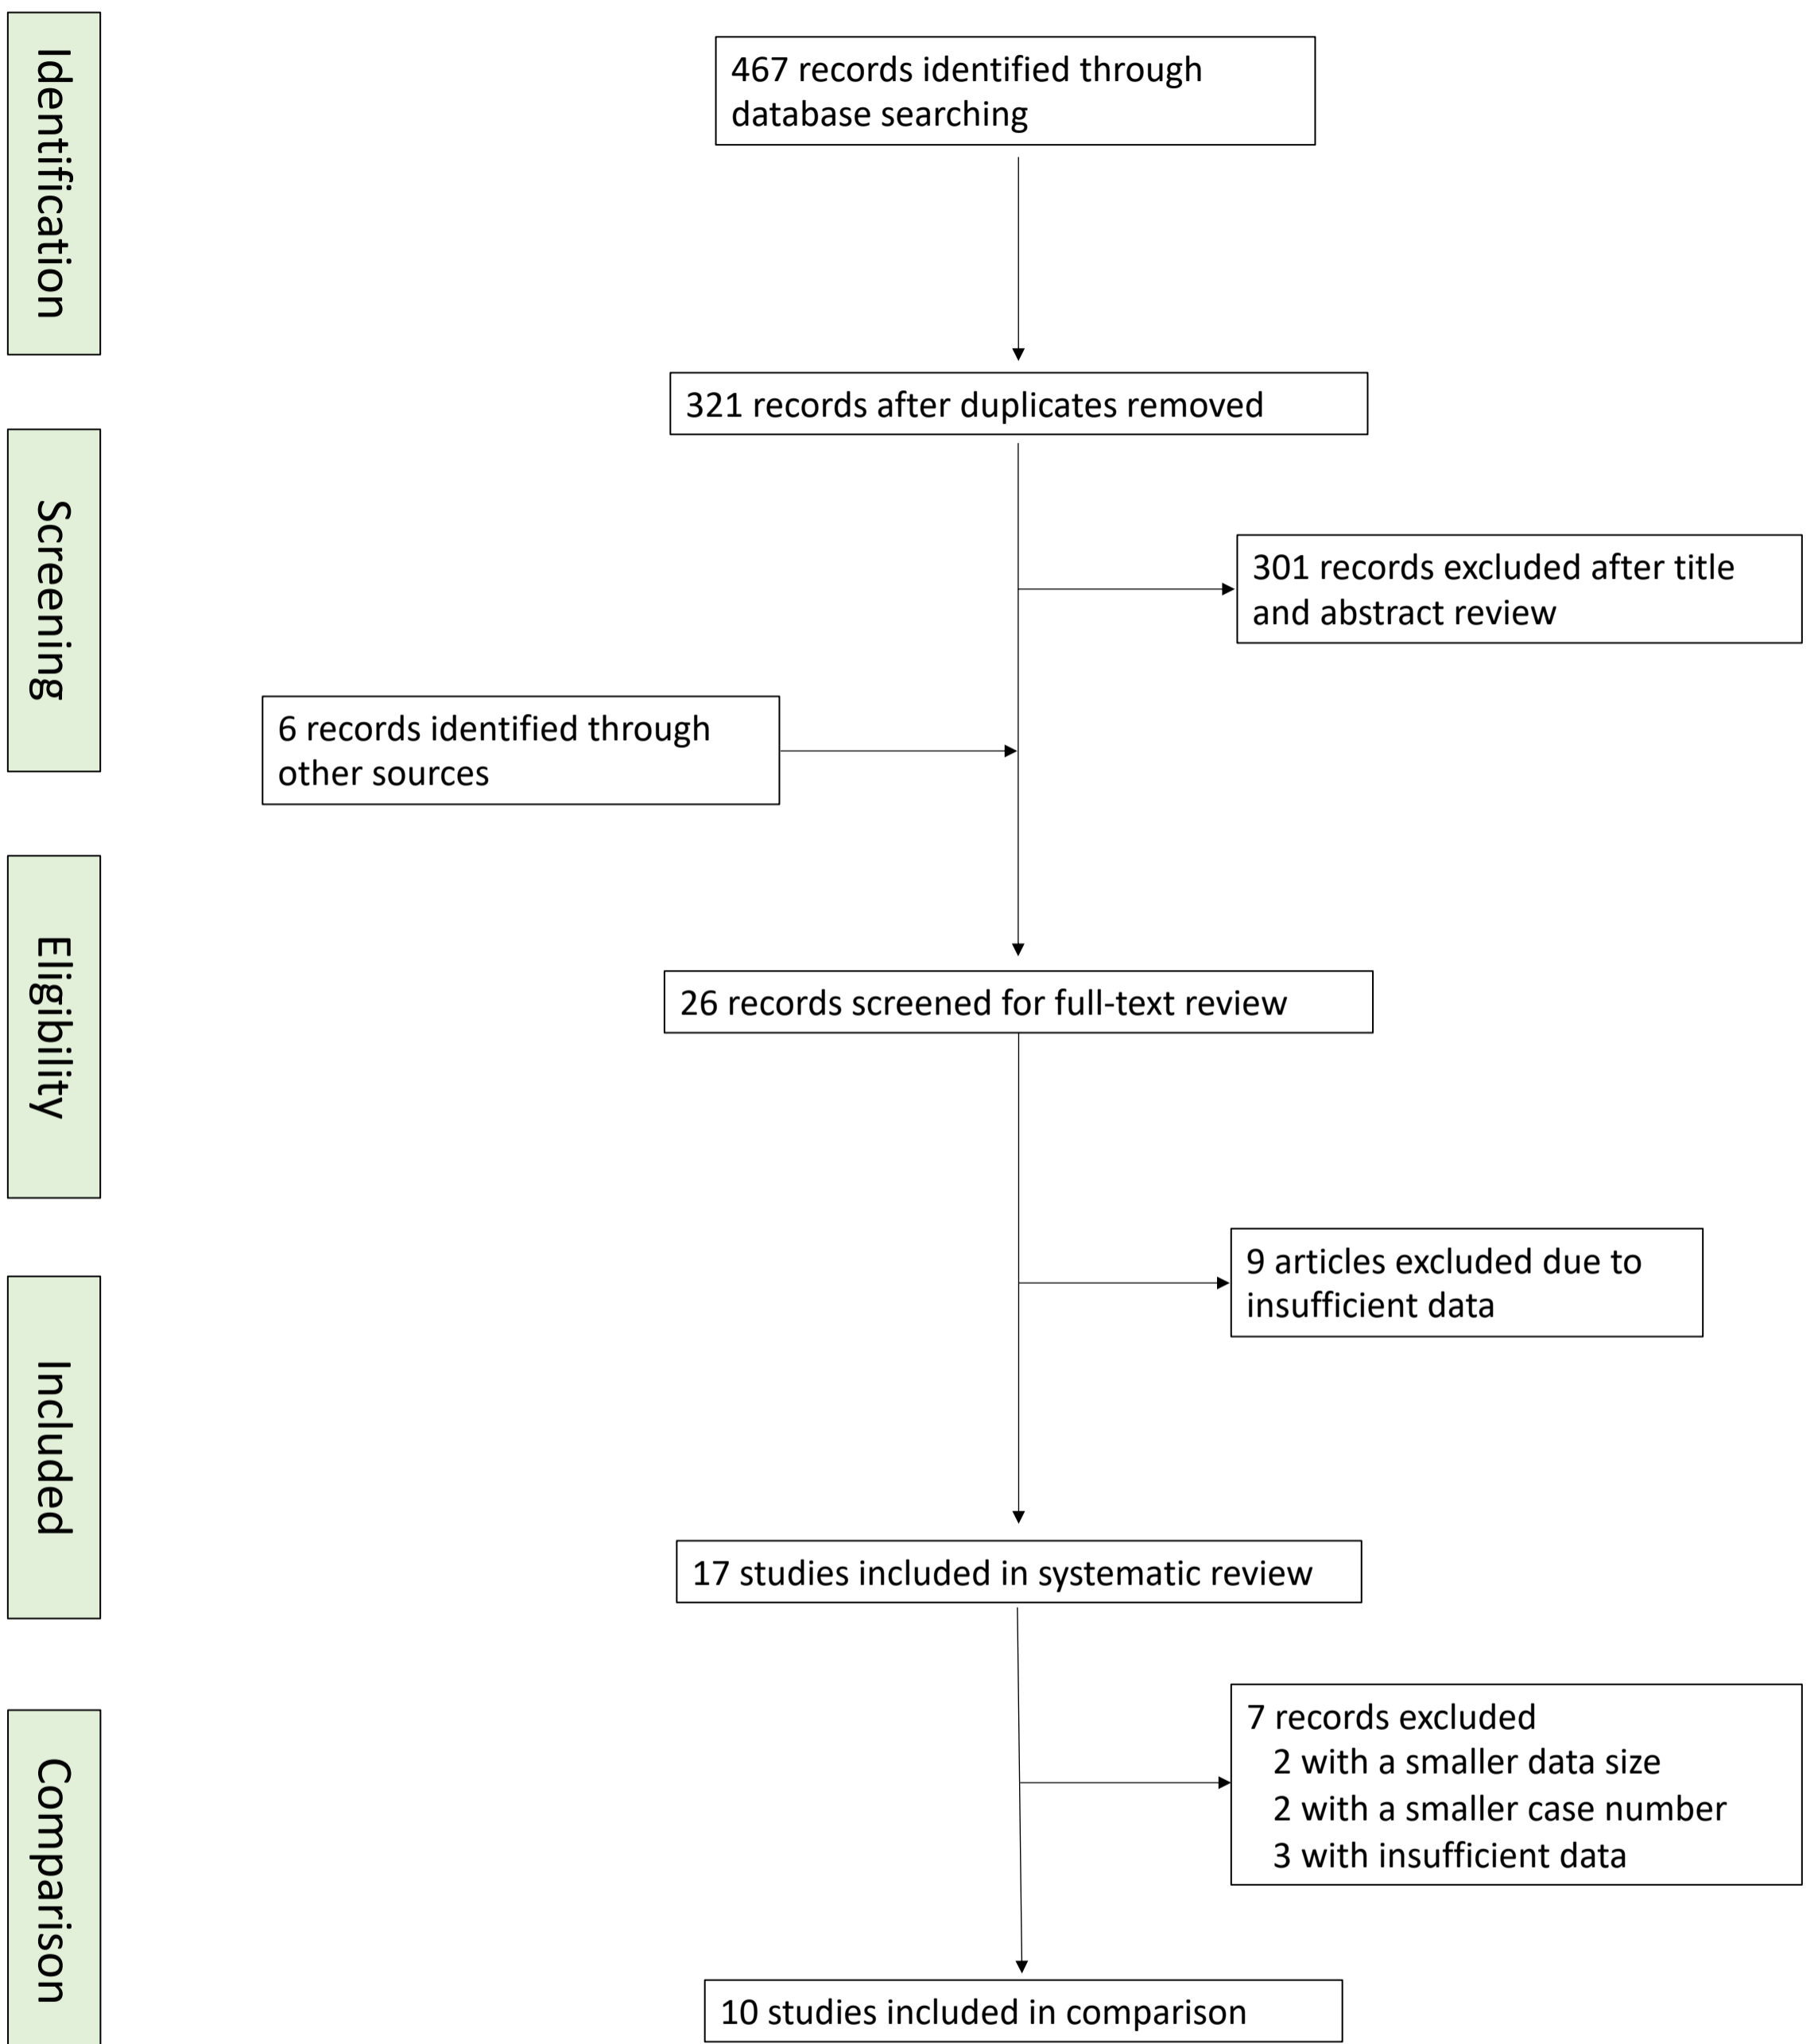

**Supplementary Figure 1.** Flowchart diagram of the study selection for systematic review on mRNA COVID-19 vaccine-associated myocarditis and pericarditis

**a**

|                      |               | Age |       |       |       |       |       |       |       |     |      |
|----------------------|---------------|-----|-------|-------|-------|-------|-------|-------|-------|-----|------|
|                      |               | 40  | 44-45 | 49-50 | 54-55 | 59-60 | 64-65 | 69-70 | 74-75 | 79  | ≥ 80 |
| <b>BNT 1st dose</b>  | <b>Male</b>   |     |       |       |       |       |       |       |       |     |      |
| Taiwan <sup>1</sup>  |               | 3.6 |       |       |       |       | 0.0   |       |       |     |      |
| US <sup>2</sup>      |               | 0.6 |       |       |       |       | 0.4   |       |       |     |      |
| Japan <sup>3</sup>   |               | 0.4 | 0.7   | 0.6   | 0.7   | 0.0   | 0.6   | 0.5   | 0.4   | 0.5 |      |
| <b>BNT 2nd dose</b>  | <b>Male</b>   |     |       |       |       |       |       |       |       |     |      |
| Nordics <sup>4</sup> |               | 1.4 |       |       |       |       |       |       |       |     |      |
| Taiwan <sup>1</sup>  |               | 2.1 |       |       |       |       | 0.0   |       |       |     |      |
| US <sup>2</sup>      |               | 3.5 |       |       |       |       | 0.7   |       |       |     |      |
| Japan <sup>3</sup>   |               | 2.5 | 0.7   | 1.3   | 1.1   | 0.4   | 0.3   | 0.3   | 0.7   | 0.2 |      |
| <b>BNT 1st dose</b>  | <b>Female</b> |     |       |       |       |       |       |       |       |     |      |
| Nordics <sup>4</sup> |               | 1.6 |       |       |       |       |       |       |       |     |      |
| Taiwan <sup>1</sup>  |               | 1.6 |       |       |       |       | 0.0   |       |       |     |      |
| US <sup>2</sup>      |               | 0.2 |       |       |       |       | 0.4   |       |       |     |      |
| Japan <sup>3</sup>   |               | 0.4 | 0.0   | 0.6   | 0.0   | 0.3   | 0.6   | 0.7   | 0.3   | 0.6 |      |
| <b>BNT 2nd dose</b>  | <b>Female</b> |     |       |       |       |       |       |       |       |     |      |
| Taiwan <sup>1</sup>  |               | 0.0 |       |       |       |       | 0.0   |       |       |     |      |
| US <sup>2</sup>      |               | 1.7 |       |       |       |       | 0.5   |       |       |     |      |
| Japan <sup>3</sup>   |               | 0.4 | 0.6   | 0.0   | 0.3   | 1.0   | 0.0   | 0.7   | 0.3   | 0.1 |      |

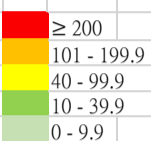

|                         |               | Age |       |       |       |       |       |       |       |     |      |
|-------------------------|---------------|-----|-------|-------|-------|-------|-------|-------|-------|-----|------|
|                         |               | 40  | 44-45 | 49-50 | 54-55 | 59-60 | 64-65 | 69-70 | 74-75 | 79  | ≥ 80 |
| <b>Moderna 1st dose</b> | <b>Male</b>   |     |       |       |       |       |       |       |       |     |      |
| Taiwan <sup>1</sup>     |               | 0.0 |       |       |       |       | 0.0   |       |       |     |      |
| US <sup>2</sup>         |               | 0.6 |       |       |       |       | 0.6   |       |       |     |      |
| Japan <sup>3</sup>      |               | 1.0 | 0.0   | 0.0   | 0.0   | 2.0   | 0.0   | 0.0   | 0.0   | 0.0 |      |
| <b>Moderna 2nd dose</b> | <b>Male</b>   |     |       |       |       |       |       |       |       |     |      |
| Taiwan <sup>1</sup>     |               | 7.7 |       |       |       |       | 0.0   |       |       |     |      |
| US <sup>2</sup>         |               | 4.3 |       |       |       |       | 0.9   |       |       |     |      |
| Japan <sup>3</sup>      |               | 2.0 | 3.5   | 1.0   | 2.5   | 2.0   | 4.1   | 0.0   | 0.0   | 0.0 |      |
| <b>Moderna 1st dose</b> | <b>Female</b> |     |       |       |       |       |       |       |       |     |      |
| Taiwan <sup>1</sup>     |               | 0.0 |       |       |       |       | 0.0   |       |       |     |      |
| US <sup>2</sup>         |               | 0.2 |       |       |       |       | 0.7   |       |       |     |      |
| Japan <sup>3</sup>      |               | 0.0 | 1.3   | 1.5   | 0.0   | 0.0   | 5.6   | 6.6   | 0.0   | 0.0 |      |
| <b>Moderna 2nd dose</b> | <b>Female</b> |     |       |       |       |       |       |       |       |     |      |
| Taiwan <sup>1</sup>     |               | 0.0 |       |       |       |       | 0.0   |       |       |     |      |
| US <sup>2</sup>         |               | 1.9 |       |       |       |       | 0.4   |       |       |     |      |
| Japan <sup>3</sup>      |               | 0.0 | 0.0   | 2.9   | 0.0   | 0.0   | 5.6   | 0.0   | 0.0   | 0.0 |      |

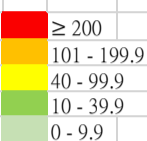**b**

|                        |               | Age  |       |       |       |       |       |       |       |     |      |
|------------------------|---------------|------|-------|-------|-------|-------|-------|-------|-------|-----|------|
|                        |               | 40   | 44-45 | 49-50 | 54-55 | 59-60 | 64-65 | 69-70 | 74-75 | 79  | ≥ 80 |
| <b>BNT 1st dose</b>    | <b>Male</b>   |      |       |       |       |       |       |       |       |     |      |
| Israel <sup>5</sup>    |               | 6.5  |       |       |       |       | 1.0   |       |       |     |      |
| Nordics <sup>4**</sup> |               | 5.5  |       |       |       |       |       |       |       |     |      |
| Taiwan <sup>1</sup>    |               | 3.6  |       |       |       |       | 0.0   |       |       |     |      |
| Japan <sup>3</sup>     |               | 0.4  | 0.7   | 0.6   | 1.1   | 0.0   | 0.6   | 0.8   | 0.7   | 1.0 |      |
| <b>BNT 2nd dose</b>    | <b>Male</b>   |      |       |       |       |       |       |       |       |     |      |
| Israel <sup>5</sup>    |               | 11.5 |       |       |       |       | 2.1   |       |       |     |      |
| Nordics <sup>4**</sup> |               | 6.5  |       |       |       |       |       |       |       |     |      |
| Taiwan <sup>1</sup>    |               | 2.1  |       |       |       |       | 0.0   |       |       |     |      |
| Japan <sup>3</sup>     |               | 3.7  | 0.7   | 1.9   | 1.1   | 0.7   | 0.3   | 0.3   | 0.7   | 0.7 |      |
| <b>BNT 1st dose</b>    | <b>Female</b> |      |       |       |       |       |       |       |       |     |      |
| Israel <sup>5</sup>    |               | 2.1  |       |       |       |       | 0.9   |       |       |     |      |
| Nordics <sup>4**</sup> |               | 5.3  |       |       |       |       |       |       |       |     |      |
| Taiwan <sup>1</sup>    |               | 1.6  |       |       |       |       | 2.2   |       |       |     |      |
| Japan <sup>3</sup>     |               | 0.7  | 0.3   | 0.8   | 0     | 0.3   | 0.6   | 1.1   | 0.3   | 0.8 |      |
| <b>BNT 2nd dose</b>    | <b>Female</b> |      |       |       |       |       |       |       |       |     |      |
| Israel <sup>5</sup>    |               | 4.5  |       |       |       |       | 1.9   |       |       |     |      |
| Nordics <sup>4**</sup> |               | 4.9  |       |       |       |       |       |       |       |     |      |
| Taiwan <sup>1</sup>    |               | 0.0  |       |       |       |       | 2.5   |       |       |     |      |
| Japan <sup>3</sup>     |               | 0.4  | 0.6   | 0     | 0.6   | 1     | 0     | 0.7   | 0.3   | 0.8 |      |

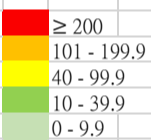

|                         |               | Age  |       |       |       |       |       |       |       |     |      |
|-------------------------|---------------|------|-------|-------|-------|-------|-------|-------|-------|-----|------|
|                         |               | 40   | 44-45 | 49-50 | 54-55 | 59-60 | 64-65 | 69-70 | 74-75 | 79  | ≥ 80 |
| <b>Moderna 1st dose</b> | <b>Male</b>   |      |       |       |       |       |       |       |       |     |      |
| Nordics <sup>4**</sup>  |               | 9.6  |       |       |       |       |       |       |       |     |      |
| Taiwan <sup>1</sup>     |               | 5.9  |       |       |       |       | 3.9   |       |       |     |      |
| Japan <sup>3</sup>      |               | 1.0  | 0.0   | 0.0   | 0.0   | 2.0   | 0.0   | 0.0   | 0.0   | 0.0 |      |
| <b>Moderna 2nd dose</b> | <b>Male</b>   |      |       |       |       |       |       |       |       |     |      |
| Nordics <sup>4**</sup>  |               | 19.5 |       |       |       |       |       |       |       |     |      |
| Taiwan <sup>1</sup>     |               | 7.7  |       |       |       |       | 0.0   |       |       |     |      |
| Japan <sup>3</sup>      |               | 3.0  | 3.5   | 1.0   | 2.5   | 2.0   | 4.1   | 0.0   | 0.0   | 0.0 |      |
| <b>Moderna 1st dose</b> | <b>Female</b> |      |       |       |       |       |       |       |       |     |      |
| Taiwan <sup>1</sup>     |               | 0.0  |       |       |       |       | 0.0   |       |       |     |      |
| Japan <sup>3</sup>      |               | 0.0  | 2.6   | 1.5   | 0.0   | 0.0   | 5.6   | 6.6   | 0.0   | 0.0 |      |
| <b>Moderna 2nd dose</b> | <b>Female</b> |      |       |       |       |       |       |       |       |     |      |
| Taiwan <sup>1</sup>     |               | 0.0  |       |       |       |       | 0.0   |       |       |     |      |
| Japan <sup>3</sup>      |               | 0.0  | 2.7   | 2.9   | 0.0   | 0.0   | 5.6   | 0.0   | 0.0   | 0.0 |      |

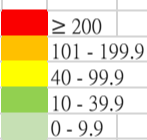**c**

|                              |               | Age |       |       |       |       |       |       |       |     |      |
|------------------------------|---------------|-----|-------|-------|-------|-------|-------|-------|-------|-----|------|
|                              |               | 40  | 44-45 | 49-50 | 54-55 | 59-60 | 64-65 | 69-70 | 74-75 | 79  | ≥ 80 |
| <b>BNT 1st dose</b>          | <b>Male</b>   |     |       |       |       |       |       |       |       |     |      |
| Ontario, Canada <sup>6</sup> |               | 0.0 |       |       |       |       |       |       |       |     |      |
| Taiwan <sup>1</sup>          |               | 5.4 |       |       |       |       | 0.0   |       |       |     |      |
| Japan <sup>3</sup>           |               | 0.4 | 1.0   | 1.0   | 1.1   | 0.0   | 1.6   | 0.8   | 1.8   | 1.5 |      |
| <b>BNT 2nd dose</b>          | <b>Male</b>   |     |       |       |       |       |       |       |       |     |      |
| Ontario, Canada <sup>6</sup> |               | 0.0 |       |       |       |       |       |       |       |     |      |
| Australia <sup>7</sup>       |               | 14  |       |       |       |       | 7     |       |       |     |      |
| Taiwan <sup>1</sup>          |               | 2.1 |       |       |       |       | 0.0   |       |       |     |      |
| Japan <sup>3</sup>           |               | 4.2 | 1.3   | 1.9   | 1.1   | 0.7   | 0.9   | 0.3   | 1.4   | 2.9 |      |
| <b>BNT 1st dose</b>          | <b>Female</b> |     |       |       |       |       |       |       |       |     |      |
| Ontario, Canada <sup>6</sup> |               | 0.0 |       |       |       |       |       |       |       |     |      |
| Taiwan <sup>1</sup>          |               | 1.6 |       |       |       |       | 2.2   |       |       |     |      |
| Japan <sup>3</sup>           |               | 1.4 | 0.6   | 1.4   | 0.3   | 0.6   | 1.4   | 1.3   | 0.6   | 1.3 |      |
| <b>BNT 2nd dose</b>          | <b>Female</b> |     |       |       |       |       |       |       |       |     |      |
| Ontario, Canada <sup>6</sup> |               | 0.0 |       |       |       |       |       |       |       |     |      |
| Australia <sup>7</sup>       |               | 18  |       |       |       |       | 4     |       |       |     |      |
| Taiwan <sup>1</sup>          |               | 0.0 |       |       |       |       | 2.5   |       |       |     |      |
| Japan <sup>3</sup>           |               | 0.4 | 0.6   | 0.3   | 0.6   | 1.6   | 0.0   | 0.9   | 0.3   | 2.3 |      |

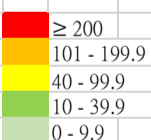

|                              |               | Age  |       |       |       |       |       |       |       |     |      |
|------------------------------|---------------|------|-------|-------|-------|-------|-------|-------|-------|-----|------|
|                              |               | 40   | 44-45 | 49-50 | 54-55 | 59-60 | 64-65 | 69-70 | 74-75 | 79  | ≥ 80 |
| <b>Moderna 1st dose</b>      | <b>Male</b>   |      |       |       |       |       |       |       |       |     |      |
| Ontario, Canada <sup>6</sup> |               | 18.3 |       |       |       |       |       |       |       |     |      |
| Taiwan <sup>1</sup>          |               | 5.9  |       |       |       |       | 3.9   |       |       |     |      |
| Japan <sup>3</sup>           |               | 3.0  | 1.7   | 0.0   | 1.2   | 2.0   | 0.0   | 0.0   | 0.0   | 0.0 |      |
| <b>Moderna 2nd dose</b>      | <b>Male</b>   |      |       |       |       |       |       |       |       |     |      |
| Ontario, Canada <sup>6</sup> |               | 0.0  |       |       |       |       |       |       |       |     |      |
| Australia <sup>7</sup>       |               | 33   |       |       |       |       | 2     |       |       |     |      |
| Taiwan <sup>1</sup>          |               | 7.7  |       |       |       |       | 4.6   |       |       |     |      |
| Japan <sup>3</sup>           |               | 4.0  | 4.4   | 1.9   | 3.7   | 2.0   | 4.1   | 0.0   | 0.0   | 0.0 |      |
| <b>Moderna 1st dose</b>      | <b>Female</b> |      |       |       |       |       |       |       |       |     |      |
| Ontario, Canada <sup>6</sup> |               | 0.0  |       |       |       |       |       |       |       |     |      |
| Taiwan <sup>1</sup>          |               | 0.0  |       |       |       |       | 2.5   |       |       |     |      |
| Japan <sup>3</sup>           |               | 1.5  | 2.6   | 2.9   | 0.0   | 0.0   | 5.6   | 6.6   | 0.0   | 0.0 |      |
| <b>Moderna 2nd dose</b>      | <b>Female</b> |      |       |       |       |       |       |       |       |     |      |
| Ontario, Canada <sup>6</sup> |               | 0.0  |       |       |       |       |       |       |       |     |      |
| Australia <sup>7</sup>       |               | 20   |       |       |       |       | 25    |       |       |     |      |
| Taiwan <sup>1</sup>          |               | 0.0  |       |       |       |       | 0.0   |       |       |     |      |
| Japan <sup>3</sup>           |               | 1.5  | 4.0   | 2.9   | 0.0   | 3.2   | 5.6   | 0.0   | 0.0   | 0.0 |      |

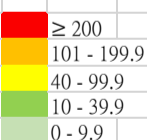

**Supplementary Figure 2.** Reported rates of myocarditis (per million persons) after the first and second doses of BNT162b2 (BNT) and mRNA-1273 (Moderna) vaccine according to sex and age group (> 40 years old)

**a)** Studies from Taiwan, the US, and Japan reported absolute risks of myocarditis (including myopericarditis but excluding pericarditis alone) in vaccinees over 40 years old at **0-7 days** after the first and second doses of BNT162b2 (BNT) and mRNA-1273 (Moderna) vaccine. Each risk stratum was marked with a corresponding color;

**b)** Studies from Israel, Taiwan, and Japan reported absolute risks of myocarditis (including myopericarditis but excluding pericarditis alone) in vaccinees over 40 years old at **0-21 days** after the first and second doses of BNT162b2 (BNT) and mRNA-1273 (Moderna) vaccine. Study from Nordics reported the risk at 0-28 days. Each risk stratum was marked with a corresponding color. **\*\***The observation period after vaccination was 28 days;

**c)** Studies from Ontario Canada, Australia, Taiwan, and Japan reported absolute risks of myocarditis (including myopericarditis but excluding pericarditis alone) in vaccinees over 40 years old **without restriction on time** after the first and second doses of BNT162b2 (BNT) and mRNA-1273 (Moderna) vaccine. Each risk stratum was marked with a corresponding color.

**Supplementary Material 1. Brighton Collaboration myocarditis case definition and levels of diagnostic certainty<sup>8</sup>**

| <b>Level of certainty 1 (definitive case)</b> |                                                                                                                                                                                                                                                                                                         |
|-----------------------------------------------|---------------------------------------------------------------------------------------------------------------------------------------------------------------------------------------------------------------------------------------------------------------------------------------------------------|
|                                               | <b>Histopathologic examination of myocardial tissue (autopsy or endomyocardial biopsy) showed myocardial inflammation</b>                                                                                                                                                                               |
| <b>OR</b>                                     |                                                                                                                                                                                                                                                                                                         |
|                                               | <b>Elevated myocardial biomarkers (at least one of the findings below)</b>                                                                                                                                                                                                                              |
|                                               | <b>Troponin T</b><br><b>Troponin I</b>                                                                                                                                                                                                                                                                  |
| <b>AND</b>                                    |                                                                                                                                                                                                                                                                                                         |
|                                               | <b>Abnormal imaging study</b>                                                                                                                                                                                                                                                                           |
|                                               | <b>Abnormal cardiac magnetic resonance study (at least one of the findings below)</b>                                                                                                                                                                                                                   |
|                                               | <b>Edema on T2-weighted study, typically patchy in nature</b><br><b>Late gadolinium enhancement on T1-weighted study with an increased enhancement ratio between myocardial and skeletal muscle typically involving at least one non-ischemic regional distribution with recovery (myocyte injury).</b> |
| <b>OR</b>                                     |                                                                                                                                                                                                                                                                                                         |
|                                               | <b>Abnormal echocardiogram (at least one of the findings below)</b>                                                                                                                                                                                                                                     |
|                                               | <b>New focal or diffuse left or right ventricular function abnormalities (e.g., decreased ejection fraction)</b><br><b>Segmental wall motion abnormalities</b><br><b>Global systolic or diastolic function depression or abnormality</b><br><b>Ventricular dilation</b><br><b>Wall thickness change</b> |

**Level of certainty 2 (probable case)****Clinical symptoms****Cardiac symptoms (at least one finding below)**

Acute chest pain or pressure  
Palpitations  
Dyspnea after exercise, at rest, or lying down  
Diaphoresis  
Sudden death

**OR****Non-specific symptoms (at least two findings below)**

Fatigue  
Abdominal pain  
Dizziness or syncope  
Edema  
Cough

**OR****Infants and young children (at least two findings below)**

Irritability  
Vomiting  
Poor feeding  
Tachypnea  
Lethargy

**AND****Testing supporting diagnosis (biomarkers, echocardiogram, and electrocardiogram)****Abnormal cardiac magnetic resonance study (see level 1 case definition)****OR****Elevated myocardial biomarkers (at least one of the findings below)**

Troponin T  
Troponin I  
Creatine kinase-myocardial band

**OR****Abnormal echocardiogram (See level 1 case definition)****OR****Electrocardiogram abnormalities that are new and/or normalize on recovery (at least 1 of the findings below)**

Paroxysmal or sustained atrial or ventricular arrhythmias (premature atrial or ventricular beats, and/or supraventricular or ventricular tachycardia, interventricular conduction delay, abnormal Q waves, low voltages)  
AV nodal conduction delays or intraventricular conduction defects (atrioventricular block (grade I-III), new bundle branch block)  
Continuous ambulatory electrocardiographic monitoring that detects frequent atrial or ventricular ectopy

**AND****No alternative diagnosis for symptoms**

**Level of certainty 3 (possible case)**

**Clinical symptoms (see level 2 case definition)**

**AND**

**Testing supporting diagnosis (biomarkers and electrocardiogram)**

**Elevated biomarkers supporting evidence of inflammation (at least 1 of the findings below)**

**Elevated c-reactive protein or high-sensitivity c-reactive protein**

**Elevated erythrocyte sedimentation rate**

**Elevated D-dimer**

**OR**

**Electrocardiogram abnormalities that are new and/or normalize on recovery (at least 1 of the findings below)**

**ST-segment or T-wave abnormalities (elevation or inversion)**

**Newly reduced r-wave height, low voltage, or abnormal q waves**

**PACs and PVCs**

**AND**

**No alternative diagnosis for symptoms**

**Supplementary Material 2.** Brighton Collaboration pericarditis case definition and levels of diagnostic certainty<sup>8</sup>

| <b>Level of certainty 1 (definitive case)</b> |                                                                                                                                                                                                                                                      |
|-----------------------------------------------|------------------------------------------------------------------------------------------------------------------------------------------------------------------------------------------------------------------------------------------------------|
|                                               | <b>Histopathologic examination of myocardial tissue (autopsy or pericardial biopsy) showed pericardial inflammation</b>                                                                                                                              |
| <b>OR</b>                                     |                                                                                                                                                                                                                                                      |
|                                               | <b>Abnormal testing (at least two of the following three findings below):<br/>Evidence of abnormal fluid collection or pericardial inflammation by imaging (echocardiogram, magnetic resonance, cardiac magnetic resonance, computed tomography)</b> |
| <b>OR</b>                                     |                                                                                                                                                                                                                                                      |
|                                               | <b>Electrocardiogram abnormalities that are new or normalize on recovery (must have all findings below)</b>                                                                                                                                          |
|                                               | <b>Diffuse concave-upward ST-segment elevation<br/>ST-segment depression in augmented vector right<br/>PR-depression throughout the leads without reciprocal ST-segment changes</b>                                                                  |
| <b>OR</b>                                     |                                                                                                                                                                                                                                                      |
|                                               | <b>Physical examination finding (at least one finding below)</b>                                                                                                                                                                                     |
|                                               | <b>Pericardial friction rub<br/>Distant heart sounds (infants and children)<br/>Pulsus paradoxus</b>                                                                                                                                                 |

**Level of certainty 2 (probable case)**

**Clinical symptoms**

**Cardiac symptoms (at least one finding below)**

**Acute chest pain or pressure**  
**Palpitations**  
**Dyspnea after exercise, at rest, or lying down**  
**Diaphoresis**  
**Sudden death**

**OR**

**Infants and young children (at least two findings below)**

**Irritability**  
**Vomiting**  
**Poor feeding**  
**Tachypnea**  
**Lethargy**

**AND**

**Physical examination findings: (at least one finding below)**

**Pericardial friction rub**  
**Pulsus paradoxus**

**OR**

**Evidence of abnormal fluid collection or pericardial inflammation by imaging (echocardiogram, magnetic resonance, cardiac magnetic resonance, computed tomography)**

**OR**

**Electrocardiogram abnormalities that are new and/or normalize on recovery (at least 1 finding below)**

**Diffuse concave-upward ST-segment elevation**  
**ST-segment depression in augmented vector right**  
**PR-depression throughout the leads without reciprocal ST-segment changes**

**AND**

**No alternative diagnosis for symptoms (myocardial infarction, pulmonary embolus, mediastinitis etc.)**



**Level of certainty 3 (possible case)**

**Clinical symptoms**

**Cardiac symptoms (at least one finding below)**

**Acute chest pain or pressure**  
**Palpitations**  
**Dyspnea after exercise, at rest, or lying down**

**AND**

**Non-specific symptoms (at least two findings below)**

**Cough**  
**Weakness**  
**Gastrointestinal – nausea, vomiting, diarrhea**  
**Shoulder/upper back pain**  
**Cyanosis**  
**Low grade intermittent fever**  
**Altered mental status**  
**Edema**  
**Fatigue**

**OR**

**Infants and young children (at least two findings below)**

**Irritability**  
**Vomiting**  
**Poor feeding**  
**Tachypnea**  
**Lethargy**

**AND**

**Abnormal testing supporting diagnosis**

**Abnormal chest radiograph showing enlarged heart**

**OR**

**Nonspecific electrocardiogram abnormalities other than those listed in LOC 1 and LOC 2 that are new or normalize on recovery**

**AND**

**No alternative diagnosis for symptoms (myocardial infarction, pulmonary embolus, mediastinitis etc.)**



## Supplementary Material 3. CDC case definitions for myocarditis and pericarditis<sup>9</sup>

### Acute Myocarditis

#### Clinical myocarditis

#### Probable Case

1. Presence of  $\geq 1$  new or worsening of the following clinical symptoms:
  - chest pain/pressure/discomfort
  - dyspnea/shortness of breath/pain with breathing
  - palpitations
  - syncope

OR, infants and children <12 years of age may instead present with  $\geq 2$  of:

  - irritability
  - vomiting
  - poor feeding
  - tachypnea
  - lethargy
- AND**
2.  $\geq 1$  new finding of:
  - troponin level above upper limit of normal (any type of troponin)
  - abnormal electrocardiogram (ECG or EKG) or rhythm monitoring findings consistent with myocarditis\*
  - abnormal cardiac function or wall motion abnormalities on echocardiogram
  - cMRI findings consistent with myocarditis<sup>†</sup>
- AND**
3. No other identifiable cause of the symptoms and findings

#### Confirmed Case

1. Presence of  $\geq 1$  new or worsening of the following clinical symptoms:
  - chest pain/pressure/discomfort
  - dyspnea/shortness of breath/pain with breathing
  - palpitations
  - syncope

OR, infants and children <12 years of age may instead present with  $\geq 2$  of:

  - irritability
  - vomiting
  - poor feeding
  - tachypnea
  - lethargy
- AND**
2.  $\geq 1$  new finding of
  - Histopathologic confirmation of myocarditis<sup>§</sup>
  - cMRI findings consistent with myocarditis<sup>†</sup> in the presence of troponin level above upper limit of normal (any type of troponin)
- AND**
3. No other identifiable cause of the symptoms and findings

\*To meet the ECG or rhythm monitoring criterion, must include at least one of:

- ST-segment or T-wave abnormalities
- Paroxysmal or sustained atrial, supraventricular, or ventricular arrhythmias
- AV nodal conduction delays or intraventricular conduction defects

<sup>†</sup>Using either the original or the revised Lake Louise criteria (Ferreira et al. *J Am Coll Cardiol.* 2018;72:3158-76)

<sup>§</sup>Using the Dallas criteria (Aretz et al. *Am J Cardiovasc Pathol.* 1987;1:3-14)

#### Notes:

1. Autopsy cases may be classified as confirmed clinical myocarditis on the basis of meeting histopathologic criteria if no other identifiable cause
2. Cases with individuals who lack the listed symptoms but who meet other criteria may be classified as subclinical myocarditis (probable or confirmed)

### Acute Pericarditis

Presence of  $\geq 2$  new or worsening of the following clinical features:

- acute chest pain\*
- pericardial rub on exam,
- new ST-elevation or PR-depression on EKG, or
- new or worsening pericardial effusion on echocardiogram or MRI

\*typically described as pain made worse by lying down, deep inspiration, or cough and relieved by sitting up or leaning forward, although other types of chest pain may occur.

#### Notes:

1. Autopsy cases may be classified as pericarditis on basis of meeting histopathologic criteria of the pericardium

## REFERENCES

1. Su WJ, Liu YL, Chang CH, et al. Risk of myocarditis and pericarditis following Coronavirus Disease 2019 messenger RNA vaccination - A nationwide study. medRxiv 2022.10.11.22280860; doi: 10.1016/j.jmii.2023.01.016
2. Oster ME, Shay DK, Su JR, et al. Myocarditis Cases Reported After mRNA-Based COVID-19 Vaccination in the US From December 2020 to August 2021. JAMA. 2022 Jan 25;327(4):331-340. doi: 10.1001/jama.2021.24110.
3. The 82nd Adverse Reaction Study Council of the Subcommittee on Immunization and Vaccine of the Ministry of Health and Welfare of Japan , the 8th Safety Measures Study Committee of the Subcommittee on Pharmaceutical Safety Measures of the Pharmaceutical Affairs and Food Sanitation Council in 2022. Accessed Dec 5, 2022. [https://www.mhlw.go.jp/stf/shingi2/0000208910\\_00046.html](https://www.mhlw.go.jp/stf/shingi2/0000208910_00046.html)
4. Karlstad O, Hovi P, Husby A, et al. SARS-CoV-2 Vaccination and Myocarditis in a Nordic Cohort Study of 23 Million Residents. JAMA Cardiol. 2022 Jun 1;7(6):600-612. doi: 10.1001/jamacardio.2022.0583.
5. Mevorach D, Anis E, Cedar N, et al. Myocarditis after BNT162b2 mRNA Vaccine against Covid-19 in Israel. N Engl J Med. 2021 Dec 2;385(23):2140-2149. doi: 10.1056/NEJMoa2109730.
6. Buchan SA, Chi Yon Seo CY, Johnson C, et al. Epidemiology of Myocarditis and Pericarditis Following mRNA Vaccination by Vaccine Product, Schedule, and Interdose Interval Among Adolescents and Adults in Ontario, Canada. JAMA Netw Open. 2022 Jun 1;5(6):e2218505. doi: 10.1001/jamanetworkopen.2022.18505.
7. COVID-19 vaccine weekly safety report - 17-11-2022. Accessed Dec 5, 2022. <https://www.tga.gov.au/news/covid-19-vaccine-safety-reports/covid-19-vaccine-safety-report-17-11-2022>
8. Tejtela SKS\*, Munozb FM , Al-Ammouric L , et al. Myocarditis and pericarditis: case definition and guidelines for data collection, analysis, and presentation of immunization safety data. Accessed Dec 5, 2022. <https://brightoncollaboration.us/myocarditis-case-definition-update/>
9. Goddard K, Lewis N, Fireman B, et al. Risk of myocarditis and pericarditis following BNT162b2 and mRNA-1273 COVID-19 vaccination. Vaccine. 2022 Aug 19;40(35):5153-5159. doi: 10.1016/j.vaccine.2022.07.007.
